# Supplementary material for: Identification and prediction of alternative transcription start sites that generate rod photoreceptor-specific transcripts from ubiquitously expressed genes
Source: PubMed Central journal article supplement (PMC5480877; doi:10.1371/journal.pone.0179230), 2017-06-22
Supplement: pone.0179230.s001.pdf [file pone.0179230.s001.pdf]

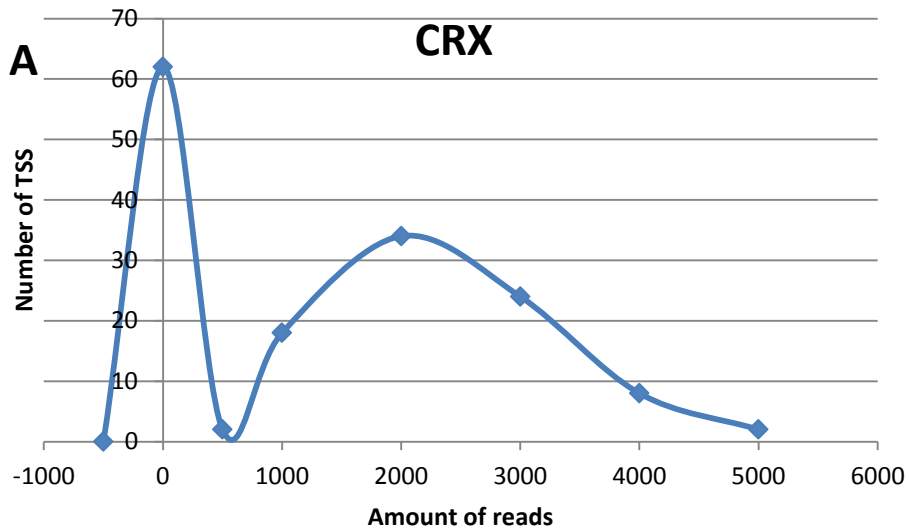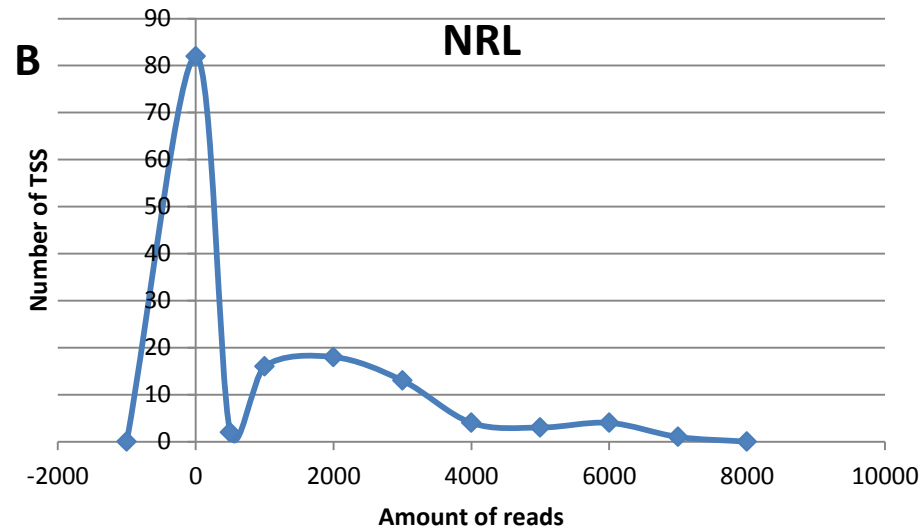

**S1 file. Fig A and B. Bimodal binding of rod TF CRX (A) and NRL (B).** **A.** For CRX -binding TSS were separated in 7 categories according to amount of reads in window TSS $\pm$  1000bp, counted in each category and plotted. Categories: 0; more than 0 but less 500 reads; more than 500 but less 1000; more than 1000 but less 2000; more than 2000 but less 3000; more than 3000 but less 4000; more than 4000 but less 5000. **B.** For NRL -binding TSS were separated in 10 categories according to amount of reads in window TSS $\pm$  1000bp, counted in each category and plotted. Categories: 0; more than 0 but less 500 reads; more than 500 but less 1000; more than 1000 but less 2000; more than 2000 but less 3000; more than 3000 but less 4000; more than 4000 but less 5000; more than 5000 but less 6000; more than 6000 but less 7000; more than 7000 but less 8000.
